# Supplementary material for: CSF ferritin in the clinicopathological progression of Alzheimer’s disease and associations with APOE and inflammation biomarkers
Source: HighWire-hosted journal article supplement (doi:10.1136/jnnp-2022-330052), 2022-11-10
Supplement: jnnp-2022-330052supp002_data_supplement.pdf [file jnnp-2022-330052supp002_data_supplement.pdf]

## Supplementary Tables

Supplementary Table 1. N table of BioFINDER subjects with cognitive performance data over time.

| Year→ |      | 0   | 1   | 2   | 3   | 4   |
|-------|------|-----|-----|-----|-----|-----|
| CU    | A-T- | 558 | 160 | 353 | 146 | 329 |
|       | A+T- | 85  | 18  | 61  | 16  | 56  |
|       | A-T+ | 25  | 2   | 15  | 1   | 10  |
|       | A+T+ | 125 | 59  | 94  | 52  | 84  |
| MCI   | A-T- | 89  | 81  | 78  | 65  | 61  |
|       | A+T- | 34  | 30  | 31  | 26  | 24  |
|       | A-T+ | 7   | 7   | 7   | 7   | 7   |
|       | A+T+ | 133 | 124 | 118 | 106 | 96  |

Supplementary Table 2. Comparison of changes in CSF apoE and ferritin with other apolipoproteins and acute phase proteins across diagnostic categories in the BioFINDER cohort. Statistics are from multiple regression models of each of the analytes including age, sex, APOE ε4, and diagnosis as covariates. β represents one standard deviation change associated with diagnosis category (reference category is CU). Ferritin and apoE were highlighted as the primary analysis, the other analytes are included as exploratory comparative results. Bold indicates P<0.05; \*Indicates correction after multiple comparison between the two primary analysis of ferritin and apoE ( $\alpha/2 = 0.025$ ).

|                      |                     | CU |      |       | MCI    |              |                            | AD    |                            |                            |
|----------------------|---------------------|----|------|-------|--------|--------------|----------------------------|-------|----------------------------|----------------------------|
|                      |                     | β  | S.E. | P     | β      | S.E.         | P                          | β     | S.E.                       | P                          |
| apolipoprotein       | apoE                | NA | NA   | NA    | -0.121 | 0.072        | 0.092                      | 0.043 | 0.087                      | 0.625                      |
|                      | apoAI               | NA | NA   | NA    | 0.057  | 0.071        | 0.422                      | 0.232 | 0.086                      | <b>0.007</b>               |
|                      | apoAII              | NA | NA   | NA    | 0.080  | 0.071        | 0.263                      | 0.207 | 0.086                      | <b>0.016</b>               |
|                      | apoAIV              | NA | NA   | NA    | 0.160  | 0.070        | <b>0.022</b>               | 0.187 | 0.084                      | <b>0.027</b>               |
|                      | apoD                | NA | NA   | NA    | 0.089  | 0.069        | 0.197                      | 0.339 | 0.084                      | <b>5.3x10<sup>-5</sup></b> |
|                      | apoM                | NA | NA   | NA    | 0.132  | 0.073        | 0.070                      | 0.202 | 0.088                      | <b>0.022</b>               |
| acute phase proteins | ferritin            | NA | NA   | NA    | 0.077  | 0.069        | 0.264                      | 0.163 | 0.083                      | <b>0.050</b>               |
|                      | α1 antichymotrypsin | NA | NA   | NA    | 0.272  | 0.069        | <b>7.8x10<sup>-5</sup></b> | 0.499 | 0.083                      | <b>2.2x10<sup>-9</sup></b> |
|                      | α1 antitrypsin      | NA | NA   | NA    | 0.136  | 0.071        | 0.054                      | 0.309 | 0.086                      | <b>3.1x10<sup>-4</sup></b> |
|                      | ceruloplasmin       | NA | NA   | NA    | 0.186  | 0.078        | <b>0.017</b>               | 0.179 | 0.094                      | 0.058                      |
|                      | complement C3       | NA | NA   | NA    | 0.128  | 0.071        | 0.070                      | 0.271 | 0.085                      | <b>0.001</b>               |
|                      | α-fibrinogen        | NA | NA   | NA    | 0.309  | 0.076        | <b>5.2x10<sup>-5</sup></b> | 0.313 | 0.093                      | <b>0.001</b>               |
|                      | β-fibrinogen        | NA | NA   | NA    | 0.245  | 0.075        | <b>0.001</b>               | 0.389 | 0.092                      | <b>2.5x10<sup>-5</sup></b> |
|                      | γ-fibrinogen        | NA | NA   | NA    | 0.188  | 0.070        | <b>0.008</b>               | 0.405 | 0.085                      | <b>2.0x10<sup>-6</sup></b> |
|                      | haptoglobin         | NA | NA   | NA    | 0.316  | 0.072        | <b>1.1x10<sup>-5</sup></b> | 0.281 | 0.087                      | <b>0.001</b>               |
| hemopexin            | NA                  | NA | NA   | 0.149 | 0.070  | <b>0.033</b> | 0.410                      | 0.084 | <b>1.2x10<sup>-6</sup></b> |                            |

**Supplementary Table 3. Comparison of changes in CSF apoE and ferritin with other apolipoproteins and acute phase proteins in strata of A and T criteria in the BioFINDER cohort.** Statistics are from mixed effects models of each of analyte including age sex *APOE*  $\epsilon 4$  A/T criteria as covariates.  $\beta$  represents one standard deviation change associated with A/T category (reference category is A-T-). Ferritin and apoE were highlighted as the primary analysis, the other analytes are included as exploratory comparative results. Bold indicates  $P < 0.05$ . ; \*Indicates correction after multiple comparison between the two primary analysis of ferritin and apoE ( $\alpha/2 = 0.025$ ).

|                      |                             | A-T-    |      |    | A+T-    |       |               | A-T+    |       |                             | A+T+    |       |                              |
|----------------------|-----------------------------|---------|------|----|---------|-------|---------------|---------|-------|-----------------------------|---------|-------|------------------------------|
|                      |                             | $\beta$ | S.E. | P  | $\beta$ | S.E.  | P             | $\beta$ | S.E.  | P                           | $\beta$ | S.E.  | P                            |
| apolipoprotein       | <b>apoE</b>                 | NA      | NA   | NA | -0.283  | 0.095 | <b>0.003*</b> | 0.709   | 0.184 | <b>1.2x10<sup>-4</sup>*</b> | 0.468   | 0.070 | <b>8.8x10<sup>-14</sup>*</b> |
|                      | apoA-I                      | NA      | NA   | NA | -0.105  | 0.097 | 0.280         | -0.134  | 0.187 | 0.473                       | 0.080   | 0.071 | 0.279                        |
|                      | apoA-II                     | NA      | NA   | NA | -0.143  | 0.097 | 0.140         | 0.059   | 0.183 | 0.746                       | 0.037   | 0.071 | 0.846                        |
|                      | apoA-IV                     | NA      | NA   | NA | -0.241  | 0.095 | <b>0.012</b>  | -0.034  | 0.181 | 0.852                       | 0.062   | 0.070 | 0.506                        |
|                      | apoD                        | NA      | NA   | NA | -0.208  | 0.094 | <b>0.027</b>  | 0.163   | 0.178 | 0.361                       | 0.220   | 0.068 | <b>0.001</b>                 |
|                      | apoM                        | NA      | NA   | NA | -0.042  | 0.100 | 0.672         | -0.016  | 0.187 | 0.931                       | 0.129   | 0.073 | 0.275                        |
| acute phase proteins | <b>ferritin</b>             | NA      | NA   | NA | 0.036   | 0.094 | 0.701         | 0.621   | 0.183 | <b>0.001*</b>               | 0.426   | 0.068 | <b>3.3x10<sup>-11</sup>*</b> |
|                      | $\alpha 1$ antichymotrypsin | NA      | NA   | NA | -0.096  | 0.094 | 0.308         | 0.205   | 0.179 | 0.252                       | 0.236   | 0.069 | 0.257                        |
|                      | $\alpha 1$ antitrypsin      | NA      | NA   | NA | -0.111  | 0.096 | 0.250         | -0.081  | 0.186 | 0.665                       | 0.090   | 0.071 | 0.606                        |
|                      | ceruloplasmin               | NA      | NA   | NA | -0.176  | 0.109 | 0.108         | 0.105   | 0.201 | 0.601                       | 0.072   | 0.079 | 0.370                        |
|                      | complement C3               | NA      | NA   | NA | -0.148  | 0.096 | 0.123         | 0.434   | 0.185 | <b>0.019</b>                | 0.173   | 0.070 | <b>0.001</b>                 |
|                      | $\alpha$ -fibrinogen        | NA      | NA   | NA | -0.092  | 0.108 | 0.391         | 0.333   | 0.199 | 0.095                       | 0.185   | 0.077 | 0.077                        |
|                      | $\beta$ -fibrinogen         | NA      | NA   | NA | -0.155  | 0.105 | 0.141         | 0.122   | 0.194 | 0.529                       | 0.186   | 0.076 | <b>5.3x10<sup>-10</sup></b>  |
|                      | $\gamma$ -fibrinogen        | NA      | NA   | NA | -0.132  | 0.096 | 0.169         | 0.090   | 0.182 | 0.620                       | 0.175   | 0.070 | <b>0.001</b>                 |
|                      | haptoglobin                 | NA      | NA   | NA | 0.140   | 0.099 | 0.158         | 0.032   | 0.190 | 0.868                       | 0.189   | 0.072 | 0.205                        |
|                      | hemopexin                   | NA      | NA   | NA | -0.137  | 0.095 | 0.151         | 0.154   | 0.180 | 0.395                       | 0.180   | 0.070 | 0.362                        |

**Supplementary Table 4. Comparison of changes in CSF apoE and ferritin in strata of A and T criteria in the BioFINDER cohort.** Subjects were limited to those that had ferritin values measured.

| Dx                    | CU          |             |              |              | MCI         |              |              |              | AD          |             |       |              | All          |
|-----------------------|-------------|-------------|--------------|--------------|-------------|--------------|--------------|--------------|-------------|-------------|-------|--------------|--------------|
|                       | -           | +           | -            | +            | -           | +            | -            | +            | -           | +           | -     | +            | All          |
| N                     | 531         | 83          | 21           | 113          | 89          | 33           | 6            | 124          | 8           | 19          | 0     | 149          | 1211         |
| Ferritin: ng/ml (SD)  | 9.63 (4.38) | 9.74 (4.39) | 13.49 (4.38) | 11.98 (4.70) | 9.49 (4.90) | 10.44 (4.52) | 13.03 (6.18) | 11.76 (4.67) | 7.93 (4.22) | 9.9 (4.88)  | NA NA | 11.95 (4.51) | 10.47 (4.65) |
| apoE: $\mu$ g/ml (SD) | 3.38 (1.06) | 3.22 (1.09) | 4.51 (1.05)  | 4.16 (1.11)  | 3.12 (1.12) | 2.8 (0.96)   | 3.81 (1.48)  | 3.74 (1.15)  | 2.35 (1.03) | 2.78 (1.21) | NA NA | 3.82 (1.27)  | 3.51 (1.16)  |

**Supplementary Table 5. Comparison of changes in CSF ferritin in strata of APOE and diagnosis in the BioFINDER cohort.** Subjects were limited to those that had ferritin values measured. Statistics are from a multiple regression model containing the following covariates: age, sex, APOE  $\epsilon$ 4, apoE level.

|            | APOE $\epsilon$ 4 -ve |       |        | APOE $\epsilon$ 4 +ve |       |        | P     |
|------------|-----------------------|-------|--------|-----------------------|-------|--------|-------|
|            | N                     | Mean  | SD     | N                     | Mean  | SD     |       |
| <b>All</b> | 692                   | 10.35 | (4.72) | 509                   | 10.63 | (4.69) | 0.994 |
| <b>CU</b>  | 502                   | 10.14 | (4.52) | 265                   | 9.97  | (4.63) | 0.670 |
| <b>MCI</b> | 132                   | 10.66 | (4.97) | 131                   | 11.11 | (4.74) | 0.724 |
| <b>AD</b>  | 58                    | 11.54 | (4.61) | 113                   | 11.61 | (4.69) | 0.214 |

**Supplementary Table 6. Demographics Table of ADNI subjects stratified by clinical (CU MCI dementia) and biomarker (A+/- and T+/-) criteria.** Values of  $A\beta_{42}$ , t-tau and p-tau181 are in pg/ml.

| Dx                              | CU          |            |            |            | MCI         |            |             |             | AD          |             |           |             |
|---------------------------------|-------------|------------|------------|------------|-------------|------------|-------------|-------------|-------------|-------------|-----------|-------------|
|                                 | -           | +          | -          | +          | -           | +          | -           | +           | -           | +           | -         | +           |
| A                               | -           | -          | +          | +          | -           | -          | +           | +           | -           | -           | +         | +           |
| T                               | -           | -          | +          | +          | -           | -          | +           | +           | -           | -           | +         | +           |
| N                               | 41          | 8          | 4          | 15         | 22          | 16         | 2           | 83          | 2           | 8           | 1         | 52          |
| Age: Mean (SD)                  | 75.0 (5.6)  | 74.1 (4.2) | 77.9 (4.7) | 78.1 (5.4) | 74.6 (7.9)  | 76.7 (3.4) | 72.3 (15.6) | 74.2 (7.6)  | 82.4 (3.0)  | 78.8 (4.6)  | 87.7 (NA) | 74.2 (7.8)  |
| Male Sex: N (%)                 | 22 (53.7)   | 4 (50.0)   | 1 (25.0)   | 10 (66.7)  | 19 (86.4)   | 12 (75.0)  | 1 (50.0)    | 50 (60.2)   | 1 (50.0)    | 6 (75.0)    | 1 (100)   | 27 (51.9)   |
| APOE $\epsilon$ 4: N (%)        | 4 (9.8)     | 6 (75.0)   | 1 (25.0)   | 7 (46.7)   | 1 (4.5)     | 10 (62.5)  | 1 (50.0)    | 57 (68.7)   | 0 (0.0)     | 6 (75.0)    | 0 (0.0)   | 39 (75.0)   |
| $A\beta_{42}$ : mean (SD)       | 1299 (263)  | 599 (103)  | 1333 (294) | 693 (194)  | 1153 (353)  | 502 (128)  | 1422 (134)  | 627 (173)   | 1189 (166)  | 570 (140)   | 1539 (NA) | 580 (207)   |
| t-tau: mean (SD)                | 188 (37)    | 218 (25)   | 298 (53)   | 327 (60)   | 185 (42)    | 202 (32)   | 287 (15)    | 379 (102)   | 154 (0.1)   | 204 (28)    | 294 (NA)  | 396 (117)   |
| $A\beta_{42}$ /t-tau: mean (SD) | 7 (1.5)     | 2.8 (0.5)  | 4.5 (0.6)  | 2.2 (0.7)  | 6.3 (1.7)   | 2.5 (0.7)  | 5 (0.2)     | 1.7 (0.6)   | 7.7 (1.1)   | 2.8 (0.6)   | 5.2 (NA)  | 1.5 (0.6)   |
| p-tau181: mean (SD)             | 16.7 (3.2)  | 20.1 (2.2) | 27.2 (4.7) | 33.3 (7.2) | 16 (3.8)    | 19.1 (3.3) | 26.4 (1.4)  | 38.9 (11.6) | 12.5 (0.9)  | 18.9 (3.0)  | 24.5 (NA) | 40.4 (13.9) |
| CDR-SB: mean (SD)               | 0.04 (0.13) | 0 (0.0)    | 0 (0.0)    | 0 (0.0)    | 1.46 (0.82) | 1.56 (1.0) | 2.50 (0.71) | 1.60 (0.86) | 4.75 (1.77) | 5.06 (2.16) | 3.5 (NA)  | 4.26 (1.46) |
| MMSE: mean (SD)                 | 29 (1.0)    | 28.9 (1.0) | 29.5 (0.6) | 29.3 (1.0) | 27.5 (1.7)  | 26.4 (1.6) | 29 (0.0)    | 26.7 (1.7)  | 25.5 (0.7)  | 22 (1.8)    | 24 (NA)   | 23.6 (1.8)  |

**Supplementary Table 7. Comparison of changes in CSF apoE and ferritin across diagnostic categories in the ADNI cohort.** Statistics are from multiple regression models of each of the analytes including age, sex, *APOE*  $\epsilon 4$ , and diagnosis as covariates.  $\beta$  represents one standard deviation change associated with diagnosis category (reference category is CU).

|                                           | CU          | MCI                  | AD                   |
|-------------------------------------------|-------------|----------------------|----------------------|
| <b>apoE (<math>\mu\text{g/ml}</math>)</b> |             |                      |                      |
| -mean; (S.D.)                             | 7.34 (1.99) | 7.06 (2.08)          | 6.76 (2.33)          |
| $-\beta$ ; (S.E.); P                      | NA NA NA    | -0.042 (0.139) 0.760 | -0.296 (0.167) 0.078 |
| <b>ferritin (ng/ml)</b>                   |             |                      |                      |
| -mean; (S.D.)                             | 6.47 (2.00) | 7.03 (2.75)          | 7.28 (3.04)          |
| $-\beta$ ; (S.E.); P                      | NA NA NA    | 0.093 (0.141) 0.513  | 0.061 (0.170) 0.720  |

**Supplementary Table 8. Comparison of changes in CSF apoE and ferritin in strata of A and T criteria in the ADNI cohort.** Statistics are from multiple regression models of each of analyte including age, sex, *APOE*  $\epsilon 4$ , and A/T criteria as covariates.  $\beta$  represents one standard deviation change associated with A/T criteria category (reference category is A-T-). Bold indicates  $P < 0.05$ .

|                                           | A-T-        | A+T-                 | A-T+                       | A+T+                                                 |
|-------------------------------------------|-------------|----------------------|----------------------------|------------------------------------------------------|
| <b>apoE (<math>\mu\text{g/ml}</math>)</b> |             |                      |                            |                                                      |
| -mean; (S.D.)                             | 6.55 (1.66) | 5.58 (1.83)          | 8.13 (1.82)                | 7.24 (2.16)                                          |
| $-\beta$ ; (S.E.); P                      | NA NA NA    | -0.354 (0.204) 0.084 | 0.913 (0.347) <b>0.009</b> | 0.545 (0.151) <b><math>3.6 \times 10^{-4}</math></b> |
| <b>ferritin (ng/ml)</b>                   |             |                      |                            |                                                      |
| -mean; (S.D.)                             | 5.93 (2.01) | 5.98 (1.71)          | 7.92 (1.13)                | 7.42 (2.93)                                          |
| $-\beta$ ; (S.E.); P                      | NA NA NA    | -0.160 (0.220) 0.468 | 0.945 (0.375) <b>0.012</b> | 0.445 (0.163) <b>0.007</b>                           |

**Supplementary Table 9. Association between ferritin and apoE levels with longitudinal CDR-SB and MMSE in CU and MCI BioFINDER subjects.**

Data are from mixed effects models of CDR-SB/MMSE including the indicated variables and their interaction with time.  $\beta$  represents a unit change in cognitive score per year per standard deviation change in each analyte. Ferritin and apoE were highlighted as the primary analysis of CDR-SB, the other analytes are included as exploratory comparative results. MMSE was included as supportive analysis. Bold indicates  $P < 0.05$ . \*Indicates correction after multiple comparison between the two primary analysis of ferritin and apoE, and the dual analysis of the group as a whole, and when stratified by A/T criteria ( $\alpha/4 = 0.0125$ ).

| Diagnosis                   | CU      |       |                            |         |       |              |         |       |                            |         |       |               | MCI     |       |                             |         |       |                            |         |       |                             |         |       |               |
|-----------------------------|---------|-------|----------------------------|---------|-------|--------------|---------|-------|----------------------------|---------|-------|---------------|---------|-------|-----------------------------|---------|-------|----------------------------|---------|-------|-----------------------------|---------|-------|---------------|
|                             | All     |       |                            | -       |       |              | +       |       |                            | +       |       |               | All     |       |                             | -       |       |                            | +       |       |                             |         |       |               |
| A                           | All     |       |                            | -       |       |              | +       |       |                            | +       |       |               | All     |       |                             | -       |       |                            | +       |       |                             |         |       |               |
| T                           | All     |       |                            | -       |       |              | +       |       |                            | +       |       |               | All     |       |                             | -       |       |                            | +       |       |                             |         |       |               |
| CDR-SB                      | $\beta$ | SE    | P                          | $\beta$ | SE    | P            | $\beta$ | SE    | P                          | $\beta$ | SE    | P             | $\beta$ | SE    | P                           | $\beta$ | SE    | P                          | $\beta$ | SE    | P                           | $\beta$ | SE    | P             |
| apoE                        | -0.003  | 0.016 | 0.860                      | -0.014  | 0.010 | 0.185        | 0.020   | 0.029 | 0.502                      | -0.195  | 0.086 | <b>0.025</b>  | 0.054   | 0.047 | 0.252                       | 0.116   | 0.074 | 0.118                      | 0.420   | 0.156 | <b>0.008*</b>               | -0.222  | 0.079 | <b>0.005*</b> |
| apoA1                       | 0.055   | 0.016 | <b>0.001</b>               | 0.032   | 0.010 | <b>0.001</b> | 0.144   | 0.035 | <b>6.2x10<sup>-5</sup></b> | 0.142   | 0.063 | <b>0.025</b>  | 0.024   | 0.043 | 0.585                       | 0.037   | 0.079 | 0.642                      | 0.214   | 0.159 | 0.184                       | -0.059  | 0.059 | 0.311         |
| apoA2                       | 0.040   | 0.016 | <b>0.013</b>               | 0.028   | 0.010 | <b>0.005</b> | 0.139   | 0.035 | <b>9.2x10<sup>-5</sup></b> | 0.096   | 0.067 | 0.153         | 0.022   | 0.045 | 0.627                       | -0.030  | 0.075 | 0.692                      | 0.314   | 0.188 | 0.097                       | 0.021   | 0.066 | 0.753         |
| apoA4                       | 0.053   | 0.017 | <b>0.001</b>               | 0.011   | 0.010 | 0.293        | 0.119   | 0.037 | <b>0.001</b>               | 0.170   | 0.064 | <b>0.009</b>  | -0.025  | 0.044 | 0.564                       | 0.029   | 0.072 | 0.693                      | 0.206   | 0.187 | 0.274                       | -0.075  | 0.064 | 0.248         |
| apoD                        | 0.037   | 0.017 | <b>0.030</b>               | 0.025   | 0.011 | <b>0.015</b> | 0.117   | 0.037 | <b>0.002</b>               | 0.070   | 0.067 | 0.300         | 0.063   | 0.041 | 0.120                       | 0.141   | 0.065 | <b>0.032</b>               | 0.520   | 0.157 | <b>0.001</b>                | -0.085  | 0.062 | 0.168         |
| apoM                        | 0.019   | 0.016 | 0.226                      | 0.023   | 0.009 | <b>0.013</b> | 0.142   | 0.037 | <b>1.7x10<sup>-4</sup></b> | -0.003  | 0.068 | 0.967         | 0.010   | 0.047 | 0.824                       | 0.117   | 0.073 | 0.111                      | 0.270   | 0.224 | 0.230                       | -0.141  | 0.072 | <b>0.049</b>  |
| ferritin                    | -0.012  | 0.016 | 0.458                      | -0.003  | 0.009 | 0.741        | -0.055  | 0.059 | 0.358                      | -0.176  | 0.068 | <b>0.010*</b> | 0.179   | 0.043 | <b>2.8x10<sup>-5*</sup></b> | 0.228   | 0.089 | <b>0.011*</b>              | 0.633   | 0.141 | <b>2.0x10<sup>-5*</sup></b> | 0.045   | 0.055 | 0.409         |
| $\alpha$ 1 antichymotrypsin | 0.055   | 0.016 | <b>0.001</b>               | 0.029   | 0.010 | <b>0.004</b> | 0.124   | 0.036 | <b>0.001</b>               | 0.075   | 0.068 | 0.266         | 0.080   | 0.045 | 0.074                       | 0.132   | 0.071 | 0.065                      | 0.317   | 0.184 | 0.088                       | 0.015   | 0.068 | 0.831         |
| $\alpha$ 1 antitrypsin      | 0.030   | 0.016 | 0.054                      | 0.019   | 0.010 | 0.054        | 0.085   | 0.031 | <b>0.007</b>               | 0.066   | 0.073 | 0.366         | 0.109   | 0.049 | <b>0.028</b>                | 0.121   | 0.090 | 0.180                      | 0.313   | 0.160 | 0.054                       | 0.038   | 0.070 | 0.581         |
| ceruloplasmin               | -0.036  | 0.018 | <b>0.045</b>               | -0.008  | 0.010 | 0.422        | 0.136   | 0.055 | <b>0.016</b>               | -0.126  | 0.067 | 0.061         | 0.020   | 0.048 | 0.672                       | 0.012   | 0.074 | 0.867                      | 0.134   | 0.193 | 0.489                       | 0.019   | 0.075 | 0.801         |
| complement C3               | 0.036   | 0.016 | <b>0.028</b>               | 0.016   | 0.010 | 0.123        | 0.091   | 0.032 | <b>0.005</b>               | 0.073   | 0.070 | 0.297         | 0.000   | 0.048 | 0.995                       | 0.088   | 0.082 | 0.283                      | -0.057  | 0.204 | 0.779                       | -0.023  | 0.068 | 0.732         |
| $\alpha$ -fibrinogen        | 0.017   | 0.019 | 0.353                      | 0.030   | 0.011 | <b>0.005</b> | 0.158   | 0.046 | <b>0.001</b>               | -0.088  | 0.075 | 0.243         | -0.025  | 0.043 | 0.566                       | -0.044  | 0.078 | 0.576                      | 0.244   | 0.164 | 0.140                       | -0.036  | 0.061 | 0.554         |
| $\beta$ -fibrinogen         | 0.029   | 0.019 | 0.121                      | 0.037   | 0.011 | <b>0.001</b> | 0.153   | 0.047 | <b>0.002</b>               | -0.076  | 0.075 | 0.312         | 0.011   | 0.044 | <b>0.803</b>                | -0.021  | 0.083 | 0.804                      | 0.255   | 0.148 | 0.089                       | 0.002   | 0.061 | 0.977         |
| $\gamma$ -fibrinogen        | 0.048   | 0.016 | <b>0.003</b>               | 0.031   | 0.010 | <b>0.001</b> | 0.056   | 0.037 | 0.131                      | 0.156   | 0.070 | <b>0.027</b>  | 0.142   | 0.048 | <b>0.003</b>                | 0.324   | 0.092 | <b>4.9x10<sup>-4</sup></b> | 0.342   | 0.155 | <b>0.030</b>                | 0.019   | 0.065 | 0.767         |
| haptoglobin                 | 0.011   | 0.016 | 0.480                      | 0.004   | 0.009 | 0.706        | -0.005  | 0.023 | 0.835                      | -0.029  | 0.069 | 0.679         | 0.104   | 0.040 | <b>0.010</b>                | 0.081   | 0.083 | 0.330                      | 0.258   | 0.172 | 0.137                       | 0.095   | 0.049 | 0.053         |
| hemopexin                   | 0.064   | 0.016 | <b>1.0x10<sup>-4</sup></b> | 0.027   | 0.010 | <b>0.007</b> | 0.162   | 0.035 | <b>1.1x10<sup>-5</sup></b> | 0.147   | 0.064 | <b>0.023</b>  | 0.018   | 0.042 | 0.659                       | 0.077   | 0.075 | 0.306                      | -0.058  | 0.131 | 0.657                       | 0.027   | 0.062 | 0.668         |
| MMSE                        | $\beta$ | SE    | P                          | $\beta$ | SE    | P            | $\beta$ | SE    | P                          | $\beta$ | SE    | P             | $\beta$ | SE    | P                           | $\beta$ | SE    | P                          | $\beta$ | SE    | P                           | $\beta$ | SE    | P             |
| apoE                        | 0.011   | 0.025 | 0.656                      | 0.027   | 0.023 | 0.235        | -0.011  | 0.052 | 0.834                      | 0.268   | 0.127 | <b>0.036</b>  | -0.139  | 0.065 | <b>0.034</b>                | 0.072   | 0.088 | 0.410                      | -0.266  | 0.165 | 0.109                       | 0.012   | 0.122 | 0.922         |
| apoA1                       | -0.042  | 0.025 | 0.089                      | -0.025  | 0.021 | 0.237        | -0.112  | 0.068 | 0.102                      | -0.159  | 0.097 | 0.100         | -0.011  | 0.062 | 0.865                       | -0.005  | 0.097 | 0.956                      | -0.141  | 0.176 | 0.427                       | 0.124   | 0.093 | 0.185         |
| apoA2                       | -0.022  | 0.025 | 0.377                      | -0.015  | 0.021 | 0.492        | -0.108  | 0.067 | 0.107                      | -0.121  | 0.101 | 0.233         | 0.033   | 0.064 | 0.605                       | 0.070   | 0.088 | 0.430                      | -0.383  | 0.204 | 0.063                       | 0.110   | 0.102 | 0.280         |
| apoA4                       | -0.026  | 0.026 | 0.322                      | -0.004  | 0.023 | 0.863        | -0.093  | 0.066 | 0.159                      | -0.078  | 0.101 | 0.440         | 0.006   | 0.064 | 0.924                       | -0.028  | 0.089 | 0.754                      | -0.156  | 0.206 | 0.451                       | 0.016   | 0.104 | 0.881         |
| apoD                        | 0.009   | 0.026 | 0.747                      | 0.021   | 0.023 | 0.353        | -0.145  | 0.068 | <b>0.035</b>               | -0.006  | 0.102 | 0.952         | -0.074  | 0.058 | 0.203                       | -0.053  | 0.079 | 0.505                      | -0.402  | 0.179 | <b>0.027</b>                | 0.073   | 0.098 | 0.453         |
| apoM                        | -0.018  | 0.023 | 0.449                      | -0.024  | 0.019 | 0.211        | -0.173  | 0.068 | <b>0.012</b>               | 0.106   | 0.107 | 0.321         | -0.002  | 0.066 | 0.971                       | -0.065  | 0.089 | 0.468                      | -0.627  | 0.234 | <b>0.009</b>                | 0.212   | 0.112 | 0.059         |
| ferritin                    | 0.043   | 0.025 | 0.088                      | 0.045   | 0.020 | 0.026        | 0.098   | 0.098 | 0.316                      | 0.250   | 0.101 | <b>0.014</b>  | -0.185  | 0.060 | <b>0.002</b>                | -0.128  | 0.107 | 0.231                      | -0.322  | 0.162 | <b>0.050</b>                | -0.061  | 0.083 | 0.464         |
| $\alpha$ 1 antichymotrypsin | -0.050  | 0.027 | 0.063                      | -0.024  | 0.023 | 0.284        | -0.176  | 0.066 | <b>0.009</b>               | -0.041  | 0.108 | 0.703         | 0.000   | 0.066 | 0.998                       | -0.004  | 0.088 | 0.960                      | -0.500  | 0.203 | <b>0.016</b>                | 0.084   | 0.109 | 0.444         |
| $\alpha$ 1 antitrypsin      | -0.021  | 0.025 | 0.399                      | -0.019  | 0.021 | 0.379        | -0.082  | 0.057 | 0.154                      | -0.061  | 0.112 | 0.587         | -0.064  | 0.069 | 0.353                       | 0.008   | 0.109 | 0.940                      | -0.288  | 0.170 | 0.094                       | 0.026   | 0.105 | 0.806         |
| ceruloplasmin               | 0.034   | 0.027 | 0.218                      | 0.003   | 0.023 | 0.904        | -0.237  | 0.095 | <b>0.015</b>               | 0.208   | 0.101 | <b>0.040</b>  | 0.095   | 0.068 | 0.161                       | 0.132   | 0.087 | 0.132                      | -0.413  | 0.213 | 0.055                       | 0.131   | 0.115 | 0.254         |
| complement C3               | -0.019  | 0.026 | 0.456                      | -0.001  | 0.022 | 0.959        | -0.082  | 0.059 | 0.165                      | -0.070  | 0.105 | 0.508         | 0.091   | 0.067 | 0.176                       | 0.031   | 0.098 | 0.751                      | 0.081   | 0.223 | 0.719                       | 0.097   | 0.103 | 0.350         |
| $\alpha$ -fibrinogen        | 0.023   | 0.028 | 0.416                      | -0.005  | 0.023 | 0.822        | -0.156  | 0.085 | 0.070                      | 0.229   | 0.109 | <b>0.036</b>  | -0.010  | 0.061 | 0.871                       | 0.128   | 0.093 | 0.168                      | -0.494  | 0.183 | <b>0.008</b>                | -0.016  | 0.094 | 0.866         |
| $\beta$ -fibrinogen         | 0.022   | 0.029 | 0.446                      | -0.019  | 0.024 | 0.434        | -0.095  | 0.082 | 0.247                      | 0.277   | 0.108 | <b>0.011</b>  | 0.009   | 0.064 | 0.882                       | 0.096   | 0.098 | 0.329                      | -0.418  | 0.173 | <b>0.017</b>                | 0.045   | 0.100 | 0.651         |
| $\gamma$ -fibrinogen        | -0.036  | 0.026 | 0.166                      | -0.039  | 0.022 | 0.068        | -0.024  | 0.071 | 0.731                      | -0.136  | 0.112 | 0.226         | -0.081  | 0.069 | 0.245                       | -0.174  | 0.114 | 0.130                      | -0.287  | 0.173 | 0.101                       | 0.053   | 0.102 | 0.603         |
| haptoglobin                 | -0.004  | 0.025 | 0.881                      | -0.001  | 0.021 | 0.954        | -0.006  | 0.055 | 0.911                      | 0.036   | 0.101 | 0.719         | -0.063  | 0.057 | 0.268                       | -0.026  | 0.099 | 0.790                      | -0.139  | 0.188 | 0.462                       | -0.043  | 0.076 | 0.573         |
| hemopexin                   | -0.051  | 0.026 | 0.052                      | -0.018  | 0.022 | 0.420        | -0.166  | 0.067 | <b>0.015</b>               | -0.137  | 0.100 | 0.171         | 0.034   | 0.060 | 0.567                       | 0.033   | 0.091 | 0.722                      | 0.070   | 0.144 | 0.630                       | 0.031   | 0.098 | 0.753         |

**Supplementary Table 10. Demographics table of BioFINDER subjects stratified by clinical diagnosis and I+ criteria.** Values of A $\beta$ <sub>42</sub>, t-tau and p-tau181 are in pg/ml.

| Dx                                        | CN         |            |            |            |            |            |            |             | MCI        |            |            |            |            |            |             |             |
|-------------------------------------------|------------|------------|------------|------------|------------|------------|------------|-------------|------------|------------|------------|------------|------------|------------|-------------|-------------|
|                                           | -          | -          | +          | +          | -          | -          | +          | +           | -          | -          | +          | +          | -          | -          | +           | +           |
| N                                         | 425        | 133        | 67         | 18         | 7          | 15         | 69         | 54          | 72         | 18         | 23         | 11         | 3          | 4          | 71          | 61          |
| Age: Mean (SD)                            | 70.0(6.0)  | 71.4(5.3)  | 71.7(4.4)  | 75.9(4.9)  | 76.3(4.2)  | 75.1(8.2)  | 73.2(5.2)  | 72.6(5.2)   | 68.5(5.9)  | 71.2(4.7)  | 71.8(5.3)  | 73.5(5.1)  | 69.7(3.2)  | 69.8(5.7)  | 71.1(5.0)   | 73.2(4.6)   |
| Female Sex: N (%)                         | 148(35)    | 66(50)     | 21(31)     | 8(44)      | 2(29)      | 8(53)      | 27(39)     | 31(57)      | 45(63)     | 17(94)     | 15(65)     | 8(73)      | 1(33)      | 4(100)     | 31(44)      | 33(54)      |
| APOE $\epsilon$ 4+ve: N (%)               | 108(26)    | 27(21)     | 36(55)     | 8(44)      | 3(43)      | 4(27)      | 43(62)     | 38(70)      | 15(21)     | 2(11)      | 16(70)     | 5(46)      | 1(33)      | 2(50)      | 49(69)      | 43(71)      |
| A $\beta$ <sub>42</sub> : mean (SD)       | 711(227)   | 809(239)   | 370(142)   | 377(118)   | 962(313)   | 1,020(260) | 351(97)    | 404(138)    | 664(206)   | 790(219)   | 336(115)   | 310(117)   | 901(356)   | 1,006(380) | 317(106)    | 372(135)    |
| t-tau: mean (SD)                          | 266(72)    | 305(72)    | 346(97)    | 372(98)    | 396(110)   | 484(86)    | 523(148)   | 588(231)    | 254(76)    | 310(60)    | 338(99)    | 400(152)   | 466(193)   | 402(99)    | 503(155)    | 650(235)    |
| A $\beta$ <sub>42</sub> /t-tau: mean (SD) | 0.13(0.02) | 0.13(0.02) | 0.08(0.02) | 0.08(0.02) | 0.12(0.02) | 0.11(0.02) | 0.06(0.02) | 0.06(0.01)  | 0.14(0.02) | 0.13(0.01) | 0.09(0.03) | 0.08(0.03) | 0.11(0.03) | 0.10(0.04) | 0.06(0.02)  | 0.06(0.02)  |
| p-tau181: mean (SD)                       | 33.9(9.5)  | 39.0(10.2) | 44.7(11.0) | 44.4(9.9)  | 75.9(24.4) | 69.4(7.3)  | 94.6(29.1) | 107.5(44.6) | 33.1(9.6)  | 40.3(8.8)  | 40.8(11.1) | 48.1(10.5) | 78.5(20.8) | 77.3(7.7)  | 102.8(36.0) | 129.6(46.8) |
| CDR-SB: mean (SD)                         | 0.2(0.4)   | 0.1(0.4)   | 0.1(0.3)   | 0.1(0.3)   | 0.0(0.0)   | 0.0(0.0)   | 0.3(0.6)   | 0.3(0.5)    | 1.3(0.9)   | 1.6(1.1)   | 1.3(0.9)   | 1.8(0.7)   | 0.5(0.0)   | 1.4(0.5)   | 1.3(0.9)    | 1.7(1.0)    |
| MMSE: mean (SD)                           | 29.0(1.0)  | 28.9(1.1)  | 29.0(0.9)  | 28.9(1.0)  | 28.9(1.1)  | 28.9(1.1)  | 28.6(1.3)  | 28.4(1.4)   | 27.5(1.9)  | 27.8(1.5)  | 27.7(2.0)  | 26.2(1.8)  | 28.0(2.0)  | 25.8(2.1)  | 26.6(1.7)   | 26.6(1.6)   |
